# Supplementary material
Source: publisher figshare collection journal article supplement (https://acs.figshare.com/ndownloader/files/5068513)
Supplement: Supplementary file 1 [file 5068513]

# Confinement effects on optical phonons in polar tetrapod nanocrystals detected by resonant inelastic light scattering

*Roman Krahné<sup>a\*</sup>, Gerwin Chilla<sup>b</sup>, Christian Schüller<sup>b+</sup>, Luigi Carbone<sup>a</sup>, Stefan Kuderá<sup>a</sup>, Gianandrea Mannarini<sup>a</sup>, Liberato Manna<sup>a</sup>, Detlef Heitmann<sup>b</sup>, Roberto Cingolani<sup>a</sup>,*

<sup>a</sup>National Nanotechnology Laboratory of CNR-INFM c/o Istituto Superiore Universitario di Formazione Interdisciplinare, Università di Lecce, Via per Arnesano, 73100 Lecce, Italy

<sup>b</sup>Institute of Applied Physics, University of Hamburg, 20355 Hamburg, Germany

<sup>+</sup> present address: Institute of Experimental and Applied Physics, University of Regensburg, 93040 Regensburg, Germany

[roman.krahne@unile.it](mailto:roman.krahne@unile.it)

**RECEIVED DATE (to be automatically inserted after your manuscript is accepted if required according to the journal that you are submitting your paper to)**

\*Corresponding author:

[roman.krahne@unile.it](mailto:roman.krahne@unile.it); tel. +39 0832 298 209; fax +39 0832 298 238

## Supplementary information

Resonant Raman Spectra of tetrapods with small arms (sample T2) at room temperature. Resonant Raman Spectra of tetrapods with small arms (sample T2) at T = 7 K.

**Supporting information:**

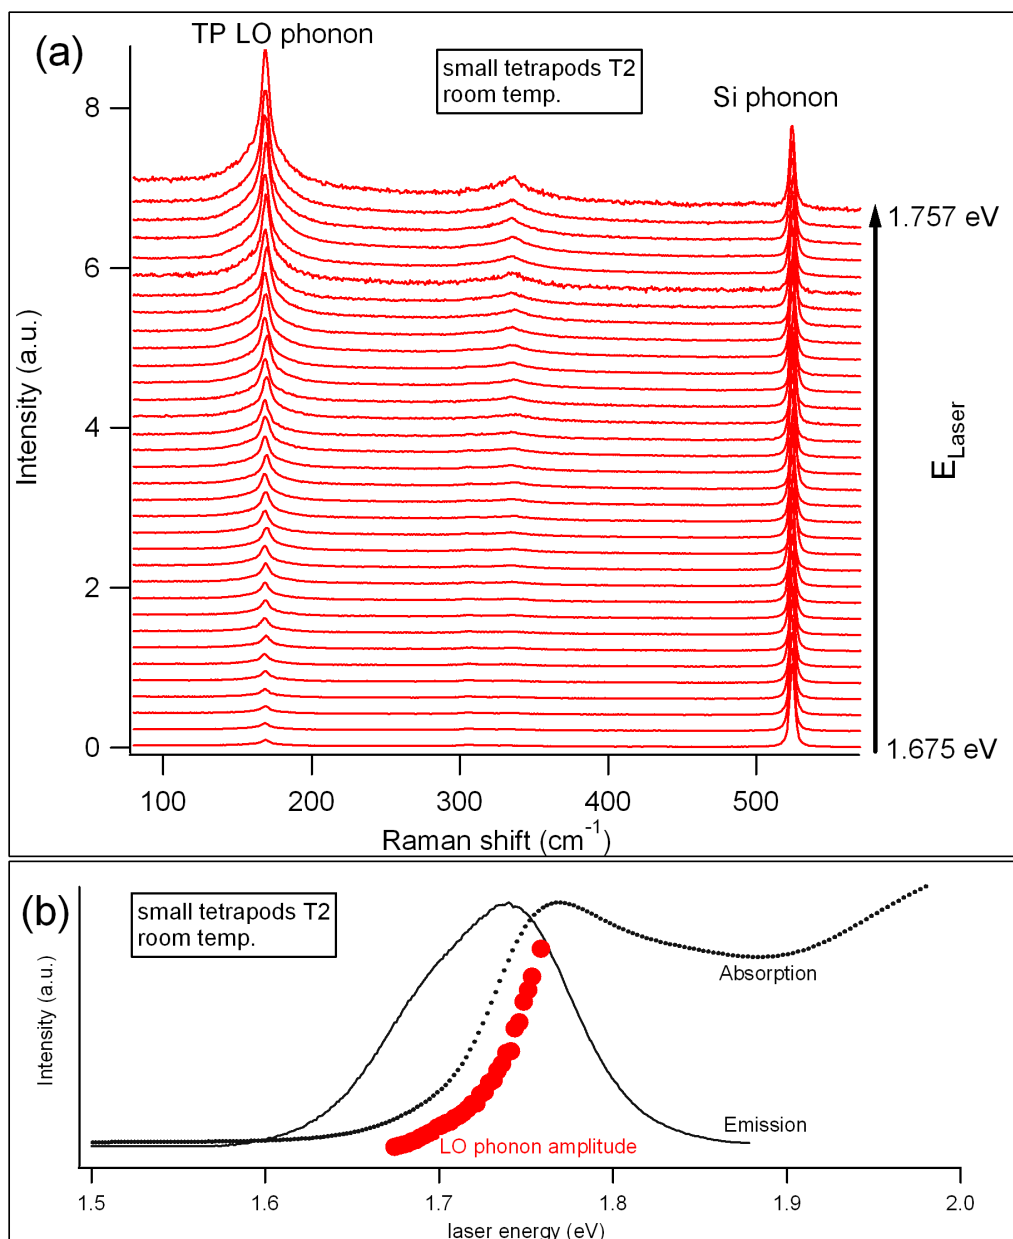

**Figure S1:** (a) Resonant Raman spectra of the small TPs T2 at room temperature. The CdTe phonon is observed at  $168.5 \text{ cm}^{-1}$ . The laser energy range is not sufficient to map the resonance maximum. The spectra are normalized with respect to the Si phonon intensity and shifted vertically for clarity; (b) TP LO phonon amplitude (red dots) and optical emission and absorption plotted versus the excitation laser energy. The phonon resonance is blue-shifted by roughly 20 meV (the LO phonon energy) with respect to the absorption curve.

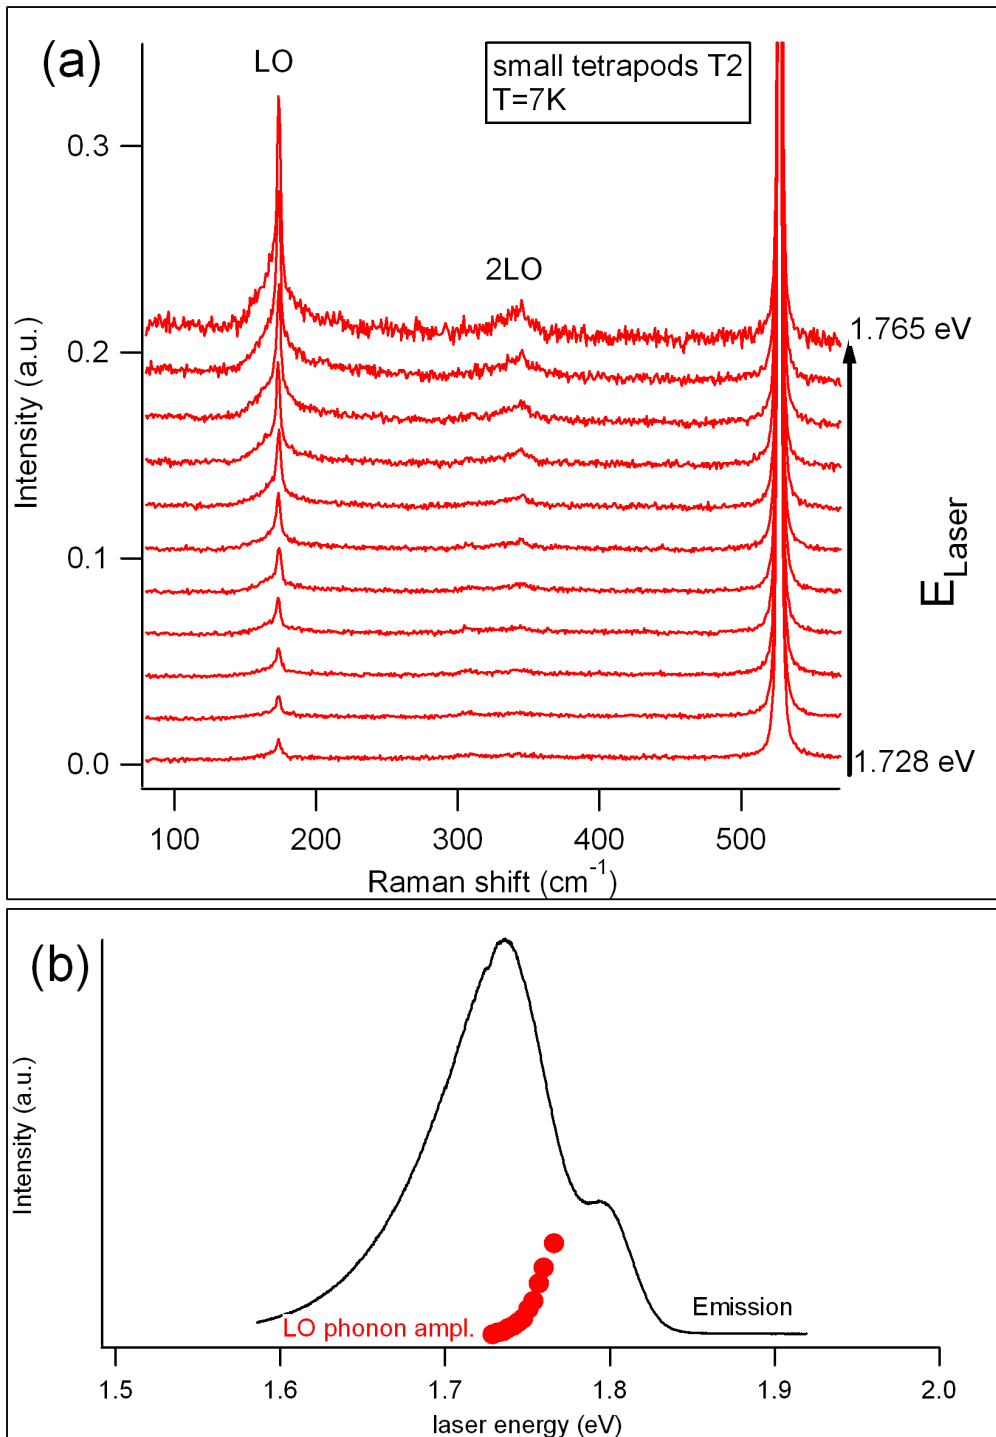

**Figure S2:** Resonant Raman spectra of the small TPs T2 at  $T = 7$  K. The laser energy range is not sufficient to map the resonance maximum. The spectra are normalized with respect to the Si phonon intensity and shifted vertically for clarity; (b) phonon amplitude and emission at  $T = 7$  K. Here the double peak in TP emission is clearly evident (emission spectrum from Ref. <sup>9</sup>).
